# Supplementary material
Source: PubMed Central journal article supplement (PMC3757370)

**Table S1: Categories, examples and properties of ATAs.** Within each of the three main categories of ATAs (targeting platelets, coagulation and fibrinolysis), there are numerous types of small molecule biological drugs with distinct mechanisms of action, routes of administration and pharmacological properties. Generally, oral ATAs have longer onset and duration time and are used for chronic thromboprophylaxis. Injectable ATAs with faster onset and shorter duration are used for therapy. Fibrinolytic plasminogen activators (PA) and translational anticoagulants APC and TM have practically immediate onset and exhibit the shortest duration.

| Category      | Subclass                               | Actions                                                                                  | Examples                                 | Route              | Onset        | Duration                            | Antidote                           |
|---------------|----------------------------------------|------------------------------------------------------------------------------------------|------------------------------------------|--------------------|--------------|-------------------------------------|------------------------------------|
| Antiplatelet  | Arachadonic Acid Metabolism Inhibitors | Irreversible COX inhibition -<br>↓ platelet activation and aggregation                   | Aspirin                                  | Oral               | ~2 hrs       | ~7 days                             | None                               |
|               | ADP Receptor Antagonists               | P2Y12 inhibition - reduction of platelet activation and aggregation                      | Clopidogrel, prasugrel, etc              | Oral               | 1-2 hours    | ~7 days                             | None                               |
|               | Glycoprotein Antagonists               | GPIIb/IIIa inhibition -<br>↓ platelet aggregation                                        | Abciximab, eptifibatid, etc              | Parenteral         | ~30 min      | 4-6 hours                           | None                               |
| Anticoagulant | Vitamin K antagonists                  | Inhibition of Vitamin K recycling -<br>↓ synthesis of multiple coagulation factors       | Warfarin                                 | Oral               | Several days | Several days                        | Plasma derivatives                 |
|               | Antithrombin activators                | Activation of Antithrombin III - inhibition of Factor Xa +/- thrombin                    | Heparin, LMWH, fondaparinux              | Parenteral         | 30 min-2hr   | Few hours (longer for fondaparinux) | Protamine (except fondaparinux)    |
|               | Direct thrombin inhibitors             | Direct, competitive inhibition of thrombin                                               | Hirudin, dabigatran, etc                 | Parenteral or oral | ~1 hr        | ~24 hours                           | None available                     |
|               | Direct Xa inhibitors                   | Direct competitive inhibition of Factor Xa                                               | Rivaraoxaban, apixiban                   | Oral               | ~1 hr        | ~24 hours                           | None available                     |
|               | Activated Protein C                    | Inactivates Factor Va, VIIIa                                                             | Drotrecogin alfa (withdrawn from market) | Parenteral         | Minutes      | Minutes                             | None                               |
|               | Thrombomodulin                         | Inhibits thrombin (cleavage of fibrinogen, activation of platelets), activates protein C | ART-123, Solulin (clinical trials)       | Parenteral         | Minutes      | From less 1 hour to 24 hours        | None                               |
| Fibrinolytic  | Tissue Plasminogen Activators          | Conversion of plasminogen to plasmin -- proteolysis of fibrin clot                       | Altelpase, tenectaplase, etc             | Parenteral         | Minutes      | From ~ 5min to ~ 30min              | Tranexamic acid, aminocaproic acid |
|               | Urinary Plasminogen Activators         |                                                                                          | Urokinase                                | Parenteral         | Minutes      | From ~ 5min to ~ 30min              |                                    |

**Figure S1. Prevention and therapy of thrombosis.** Blood clots form upon activation of platelets and the coagulation cascade, which in a simplistic interpretation, dominate arterial and venous clotting, respectively (i.e., “white” and “red” clots). However, these pathways are closely intertwined: e.g., activated platelets support coagulation, while thrombin activates platelets. Blocking either pathway with anti-thrombotic agents (ATA) inhibits the other to some extent. Inhibition of both pathways provides greater protection against thrombosis but increases the risk of bleeding. Anti-platelet agents and anticoagulants are used most commonly to prevent clotting (chronic prophylaxis, usually using orally administered drugs) and, in some acute settings, to inhibit ongoing thrombosis (therapy, usually using injectable drugs). Fibrinolytic agents are used as an emergency therapy in acute settings to lyse occlusive thrombi. Tissue type and urokinase type plasminogen activators (PAs) (tPA and uPA) are serine proteases (MW ~50-60kD) that cleave plasminogen into a broad specificity serine protease, plasmin, that cleaves fibrin (among other substrates). The enzymatic activity of PAs and plasmin are inhibited by “suicide substrates” (primarily PAI-1 and  $\alpha_2$ -PI, respectively) by forming inactive complexes that are cleared rapidly from the circulation.

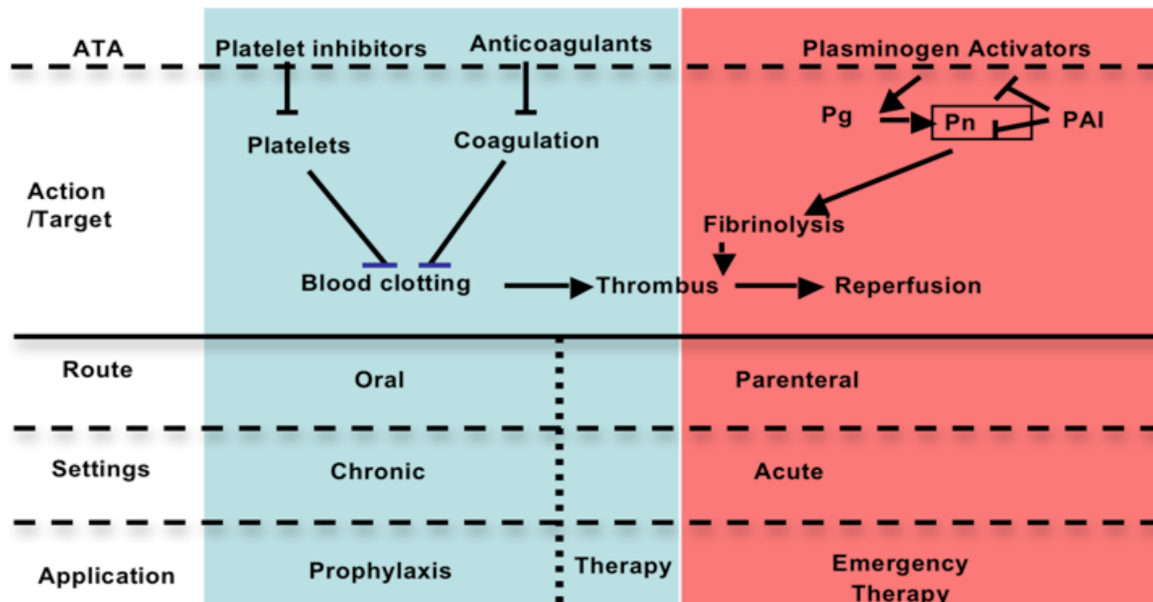

**Figure S2. Local release and thrombolysis by flow-sensitive nanocarriers.** Intravenously injected shear-activated nanotherapeutics (SA-NTs) dissociate into NPs at the thrombus site due to the enhanced shear stress. Accumulation of tPA-coated nanoparticles at the occlusion site leads to progressive dissolution of the clot. Due to the high local drug concentration achievable with the SA-NTs, this strategy may be suitable for dissolving partially occlusive clots, though it remains unlikely that any currently available drug/DDS will be able to dissolve fully occlusive clots.

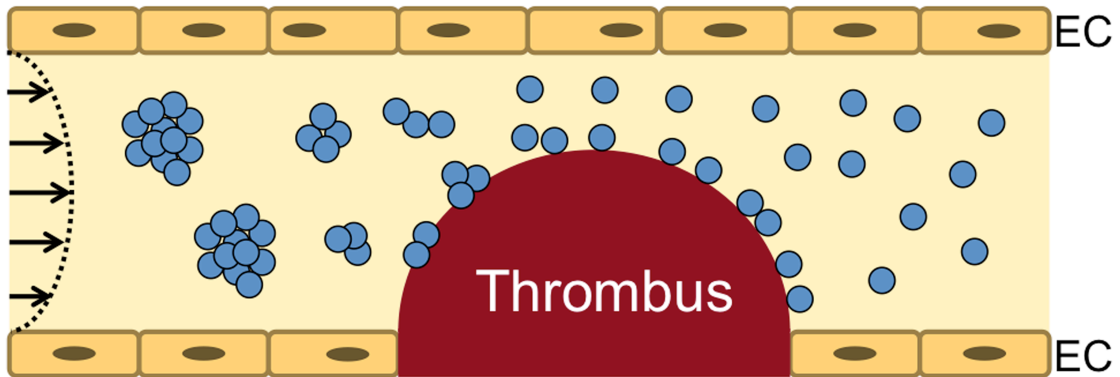

**Figure S3. Recombinant ATA fusions with targeting scFv.** (A) Constitutively active scFv/tPA fusion. Indicated are sequences of standard peptides connecting heavy and light chains and scFv with ATAs. (B) Clot-targeted scFv/hirudin fusion with Factor Xa - sensitive cleavage site in the connecting peptide. (C) Wild-type, plasmin-activated scFv/uPA fusion (uPA moiety is 1mw scuPA). (D) Plasmin-resistant, thrombin-activated mutant of 1mw scuPA fused with scFv targeted to RBC or endothelium (scFv/uPA-T).

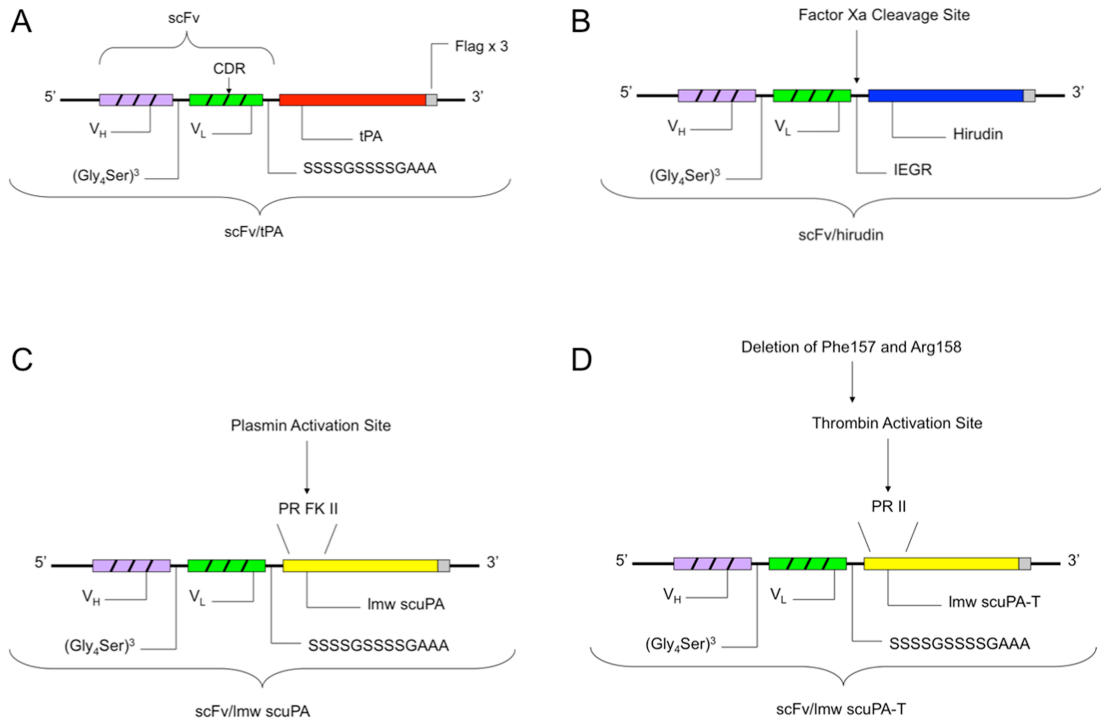

**Figure S4: Proposed utility of RBC-targeted ATA for emergency management of NSTEMI and other forms of recurrent thrombosis.** Recurrent cycles of partial thrombotic occlusion and incomplete clot lysis (time intervals T1-T5) typical of non-ST elevated myocardial infarction may eventuate in complete occlusion and transmural AMI. Rapid clearance and risk of side effects render fibrinolytic PAs ineffective in this setting (upper panel). A single injection of RBC-targeted scFv/pro-drug ATA fusion proteins (e.g., TM or thrombin-activated PA) would provide localized anti-thrombotic activity for the duration of highest risk (lower panel).

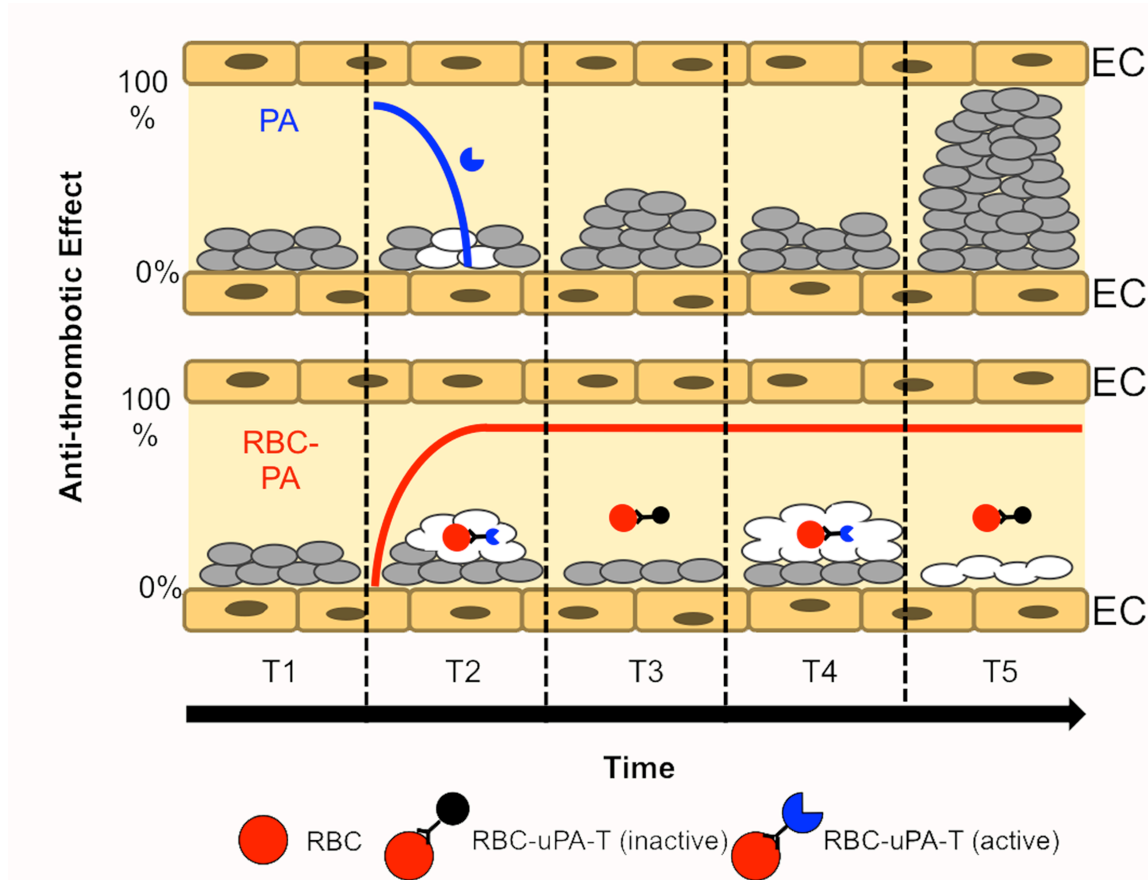

Supplement: supp_blood-2013-03-453498_blood-2013-03-453498-1.pdf [file supp_blood-2013-03-453498_blood-2013-03-453498-1.pdf]
